# Supplementary material for: Impact of tobacco control interventions on socioeconomic inequalities in smoking: review of the evidence
Source: HighWire-hosted journal article supplement (doi:10.1136/tobaccocontrol-2013-051110), 2013-09-17
Supplement: tobaccocontrol-2013-051110supp.pdf [file tobaccocontrol-2013-051110supp.pdf]

## Appendix: Search strategy for literature review

The following search terms, with adjustments to the wildcards and operators where appropriate, were used on BIOSIS, CINAHL Plus, Cochrane Library, DARE Database, EMBASE, EconLit, ISI Technology and Science Proceedings, Medline, PsycInfo, Science Citation Index, and the Social Science Citation Index for articles published from January 2006 to September 2010.

1. smoking
2. smoking cessation
3. tobacco
4. "tobacco use disorder"
5. nicotine
6. smokers or smoker
7. cigar\*
8. OR/1-7
9. ((smok\* or anti NEXT smok\* or tobacco or cigarette\*) NEAR/3 (ban or bans or prohibit\* or restrict\* or discourage\*))
10. ((smok\* or anti NEXT smok\* or tobacco or cigarette\*) NEAR/3 (workplace or work NEXT place or work NEXT site or worksite))
11. TI ((smok\* or anti-smok\* or tobacco or cigarette\*) N3 (public place\* or public space\* or public area\* or office\* or school\* or institution\*)) OR AB ((smok\* or anti NEXT smok\* or tobacco or cigarette\*) NEAR/3 (public place\* or public space\* or public area\* or office\* or school\* or institution\*))
12. ((smok\* or anti NEXT smok\* or tobacco or cigarette\*) NEAR/3 (legislat\* or government\* or authorit\* or law or laws or bylaw\* or byelaw\* or bye NEXT law\* or regulation\*))
13. ((tobacco NEXT free or smoke NEXT free) NEAR/3 (hospital or inpatient or outpatient or institution\*))
14. ((tobacco NEXT free or smoke NEXT free) NEAR/3 (facilit\* or zone\* or area\* or site\* or place\* or environment\* or air))
15. ((tobacco or smok\* or cigarette\*) NEAR/3 (campaign\* or advertis\* or advertiz\*))
16. ((billboard\* or advertis\* or advertiz\* or sale or sales or sponsor\*) NEAR/3 (restrict\* or limit\* or ban or bans or prohibit\*))
17. (tobacco NEXT control NEAR/3 (program\* or initiative\* or policy or policies or intervention\* or activity or activities or framework))
18. ((smok\* or tobacco) adj (policy or policies or program\*))
19. ((retailer\* or vendor\*) NEAR/3 (educat\* or surveillance\* or prosecut\* or legislat\*))
20. test purchas\*
21. voluntary agreement\*
22. health warning\*
23. ((tobacco or cigarette\*) NEAR/3 (tax or taxes or taxation or excise or duty NEXT free or duty NEXT paid or customs))
24. ((cigarette\* or tobacco) NEAR/3 (packaging or packet\*))
25. ((cigarette\* or tobacco) NEAR/3 (marketing or marketed))
26. ((cigarette\* or tobacco) NEAR/3 (price\* or pricing))
27. point of sale
28. vending machine\*

30. (trade NEXT (restrict\* or agreement\*))
32. (contraband\* or smuggl\* or bootleg\* or cross NEXT border shopping)
33. (tobacco control act or clean air or clean indoor air)
34. ((reduce\* or prevent\*) NEAR/3 (environmental tobacco smoke or passive smok\* or secondhand smok\* or second hand smok\* or SHS))
35. ((population level or population based or population orientated or population oriented) NEAR/3 (intervention\* or prevention or policy or policies or program\* or project\*))
36. (community) NEAR/3 (intervention\* or prevention or policy or policies or program\* or project\*))
37. "smoking cessation" or "cessation support"
38. smokefree or smoke-free or "smoke free"
39. 8 AND OR/9-38
